# Supplementary material
Source: publisher figshare collection journal article supplement (https://sage.figshare.com/ndownloader/files/17829953)
Supplement: Supplementary file 1 [file 17829953]

## Medical and Dental Electronic Health Record Reporting Discrepancies in Integrated Patient Care

S. Adibi, M. Li, N. Salazar, D. Seferovic, K. Kookal, J.N. Holland, M. Walji, and M.C. Farach-Carson

### Appendix

#### Appendix 1: Hypertension ICD diagnostic codes

| ICD Code        | Code Description                                                                                                                                         |
|-----------------|----------------------------------------------------------------------------------------------------------------------------------------------------------|
| ICD9:401        | Essential hypertension                                                                                                                                   |
| ICD9:401.0      | Malignant essential hypertension                                                                                                                         |
| ICD9:401.1      | Benign essential hypertension                                                                                                                            |
| ICD9:401.9      | Unspecified essential hypertension                                                                                                                       |
| ICD9:401-405.99 | HYPERTENSIVE DISEASE                                                                                                                                     |
| ICD9:402        | Hypertensive heart disease                                                                                                                               |
| ICD9:402.0      | Malignant hypertensive heart disease                                                                                                                     |
| ICD9:402.00     | Malignant hypertensive heart disease without heart failure                                                                                               |
| ICD9:402.01     | Malignant hypertensive heart disease with heart failure                                                                                                  |
| ICD9:402.1      | Benign hypertensive heart disease                                                                                                                        |
| ICD9:402.10     | Benign hypertensive heart disease without heart failure                                                                                                  |
| ICD9:402.11     | Benign hypertensive heart disease with heart failure                                                                                                     |
| ICD9:402.9      | Unspecified hypertensive heart disease                                                                                                                   |
| ICD9:402.90     | Unspecified hypertensive heart disease without heart failure                                                                                             |
| ICD9:402.91     | Unspecified hypertensive heart disease with heart failure                                                                                                |
| ICD9:403        | Hypertensive chronic kidney disease                                                                                                                      |
| ICD9:403.0      | Hypertensive chronic kidney disease, malignant                                                                                                           |
| ICD9:403.00     | Hypertensive chronic kidney disease, malignant, with chronic kidney disease stage I through stage IV, or unspecified                                     |
| ICD9:403.01     | Hypertensive chronic kidney disease, malignant, with chronic kidney disease stage V or end stage renal disease                                           |
| ICD9:403.1      | Hypertensive renal disease, benign                                                                                                                       |
| ICD9:403.10     | Hypertensive chronic kidney disease, benign, with chronic kidney disease stage I through stage IV, or unspecified                                        |
| ICD9:403.11     | Hypertensive chronic kidney disease, benign, with chronic kidney disease stage V or end stage renal disease                                              |
| ICD9:403.9      | Hypertensive renal disease, unspecified                                                                                                                  |
| ICD9:403.90     | Hypertensive chronic kidney disease, unspecified, with chronic kidney disease stage I through stage IV, or unspecified                                   |
| ICD9:403.91     | Hypertensive chronic kidney disease, unspecified, with chronic kidney disease stage V or end stage renal disease                                         |
| ICD9:404        | Hypertensive heart and chronic kidney disease                                                                                                            |
| ICD9:404.0      | Hypertensive heart and chronic kidney disease, malignant                                                                                                 |
| ICD9:404.00     | Hypertensive heart and chronic kidney disease, malignant, without heart failure and with chronic kidney disease stage I through stage IV, or unspecified |

|             |                                                                                                                                                            |
|-------------|------------------------------------------------------------------------------------------------------------------------------------------------------------|
| ICD9:404.01 | Hypertensive heart and chronic kidney disease, malignant, with heart failure and with chronic kidney disease stage I through stage IV, or unspecified      |
| ICD9:404.02 | Hypertensive heart and chronic kidney disease, malignant, without heart failure and with chronic kidney disease stage V or end stage renal disease         |
| ICD9:404.03 | Hypertensive heart and chronic kidney disease, malignant, with heart failure and with chronic kidney disease stage V or end stage renal disease            |
| ICD9:404.1  | Hypertensive heart and renal disease, benign                                                                                                               |
| ICD9:404.10 | Hypertensive heart and chronic kidney disease, benign, without heart failure and with chronic kidney disease stage I through stage IV, or unspecified      |
| ICD9:404.11 | Hypertensive heart and chronic kidney disease, benign, with heart failure and with chronic kidney disease stage I through stage IV, or unspecified         |
| ICD9:404.12 | Hypertensive heart and chronic kidney disease, benign, without heart failure and with chronic kidney disease stage V or end stage renal disease            |
| ICD9:404.13 | Hypertensive heart and chronic kidney disease, benign, with heart failure and chronic kidney disease stage V or end stage renal disease                    |
| ICD9:404.9  | Hypertensive heart and renal disease, unspecified                                                                                                          |
| ICD9:404.90 | Hypertensive heart and chronic kidney disease, unspecified, without heart failure and with chronic kidney disease stage I through stage IV, or unspecified |
| ICD9:404.91 | Hypertensive heart and chronic kidney disease, unspecified, with heart failure and with chronic kidney disease stage I through stage IV, or unspecified    |
| ICD9:404.92 | Hypertensive heart and chronic kidney disease, unspecified, without heart failure and with chronic kidney disease stage V or end stage renal disease       |
| ICD9:404.93 | Hypertensive heart and chronic kidney disease, unspecified, with heart failure and chronic kidney disease stage V or end stage renal disease               |
| ICD9:405    | Secondary hypertension                                                                                                                                     |
| ICD9:405.0  | Malignant secondary hypertension                                                                                                                           |
| ICD9:405.01 | Malignant renovascular hypertension                                                                                                                        |
| ICD9:405.09 | Other malignant secondary hypertension                                                                                                                     |
| ICD9:405.1  | Benign secondary hypertension                                                                                                                              |
| ICD9:405.11 | Benign renovascular hypertension                                                                                                                           |
| ICD9:405.19 | Other benign secondary hypertension                                                                                                                        |
| ICD9:405.9  | Unspecified secondary hypertension                                                                                                                         |
| ICD9:405.91 | Unspecified renovascular hypertension                                                                                                                      |
| ICD9:405.99 | Other unspecified secondary hypertension                                                                                                                   |

## Appendix 2: Diabetes ICD diagnostic codes

| ICD Code    | Code Description                                                                                        |
|-------------|---------------------------------------------------------------------------------------------------------|
| ICD9:250    | Diabetes mellitus                                                                                       |
| ICD9:250.2  | Diabetes mellitus with hyperosmolarity                                                                  |
| ICD9:250.9  | Diabetes with unspecified complication                                                                  |
| ICD9:250.8  | Diabetes with other specified manifestations                                                            |
| ICD9:250.0  | Diabetes mellitus without mention of complication                                                       |
| ICD9:250.1  | Diabetes with ketoacidosis                                                                              |
| ICD9:250.3  | Diabetes with other coma                                                                                |
| ICD9:250.4  | Diabetes with renal manifestations                                                                      |
| ICD9:250.5  | Diabetes with ophthalmic manifestations                                                                 |
| ICD9:250.7  | Diabetes with peripheral circulatory disorders                                                          |
| ICD9:250.6  | Diabetes with neurological manifestations                                                               |
| ICD9:250.72 | Diabetes with peripheral circulatory disorders, type II or unspecified type, uncontrolled               |
| ICD9:250.71 | Diabetes with peripheral circulatory disorders, type I [juvenile type], not stated as uncontrolled      |
| ICD9:250.73 | Diabetes with peripheral circulatory disorders, type I [juvenile type], uncontrolled                    |
| ICD9:250.70 | Diabetes with peripheral circulatory disorders, type II or unspecified type, not stated as uncontrolled |
| ICD9:250.61 | Diabetes with neurological manifestations, type I [juvenile type], not stated as uncontrolled           |
| ICD9:250.63 | Diabetes with neurological manifestations, type I [juvenile type], uncontrolled                         |
| ICD9:250.62 | Diabetes with neurological manifestations, type II or unspecified type, uncontrolled                    |
| ICD9:250.60 | Diabetes with neurological manifestations, type II or unspecified type, not stated as uncontrolled      |
| ICD9:250.51 | Diabetes with ophthalmic manifestations, type I [juvenile type], not stated as uncontrolled             |
| ICD9:250.52 | Diabetes with ophthalmic manifestations, type II or unspecified type, uncontrolled                      |
| ICD9:250.50 | Diabetes with ophthalmic manifestations, type II or unspecified type, not stated as uncontrolled        |
| ICD9:250.53 | Diabetes with ophthalmic manifestations, type I [juvenile type], uncontrolled                           |
| ICD9:250.42 | Diabetes with renal manifestations, type II or unspecified type, uncontrolled                           |
| ICD9:250.40 | Diabetes with renal manifestations, type II or unspecified type, not stated as uncontrolled             |
| ICD9:250.41 | Diabetes with renal manifestations, type I [juvenile type], not stated as uncontrolled                  |
| ICD9:250.43 | Diabetes with renal manifestations, type I [juvenile type], uncontrolled                                |
| ICD9:250.30 | Diabetes with other coma, type II or unspecified type, not stated as uncontrolled                       |
| ICD9:250.31 | Diabetes with other coma, type I [juvenile type], not stated as uncontrolled                            |
| ICD9:250.32 | Diabetes with other coma, type II or unspecified type, uncontrolled                                     |
| ICD9:250.33 | Diabetes with other coma, type I [juvenile type], uncontrolled                                          |
| ICD9:250.13 | Diabetes with ketoacidosis, type I [juvenile type], uncontrolled                                        |
| ICD9:250.11 | Diabetes with ketoacidosis, type I [juvenile type], not stated as uncontrolled                          |
| ICD9:250.12 | Diabetes with ketoacidosis, type II or unspecified type, uncontrolled                                   |

|             |                                                                                                            |
|-------------|------------------------------------------------------------------------------------------------------------|
| ICD9:250.10 | Diabetes with ketoacidosis, type II or unspecified type, not stated as uncontrolled                        |
| ICD9:250.02 | Diabetes mellitus without mention of complication, type II or unspecified type, uncontrolled               |
| ICD9:250.00 | Diabetes mellitus without mention of complication, type II or unspecified type, not stated as uncontrolled |
| ICD9:250.01 | Diabetes mellitus without mention of complication, type I [juvenile type], not stated as uncontrolled      |
| ICD9:250.03 | Diabetes mellitus without mention of complication, type I [juvenile type], uncontrolled                    |
| ICD9:250.90 | Diabetes with unspecified complication, type II or unspecified type, not stated as uncontrolled            |
| ICD9:250.91 | Diabetes with unspecified complication, type I [juvenile type], not stated as uncontrolled                 |
| ICD9:250.93 | Diabetes with unspecified complication, type I [juvenile type], uncontrolled                               |
| ICD9:250.92 | Diabetes with unspecified complication, type II or unspecified type, uncontrolled                          |
| ICD9:250.81 | Diabetes with other specified manifestations, type I [juvenile type], not stated as uncontrolled           |
| ICD9:250.83 | Diabetes with other specified manifestations, type I [juvenile type], uncontrolled                         |
| ICD9:250.80 | Diabetes with other specified manifestations, type II or unspecified type, not stated as uncontrolled      |
| ICD9:250.82 | Diabetes with other specified manifestations, type II or unspecified type, uncontrolled                    |
| ICD9:250.20 | Diabetes with hyperosmolarity, type II or unspecified type, not stated as uncontrolled                     |
| ICD9:250.23 | Diabetes with hyperosmolarity, type I [juvenile type], uncontrolled                                        |
| ICD9:250.21 | Diabetes with hyperosmolarity, type I [juvenile type], not stated as uncontrolled                          |
| ICD9:250.22 | Diabetes with hyperosmolarity, type II or unspecified type, uncontrolled                                   |
